# Supplementary material for: Evaluation of the dialysis time required for carbon dots by HPLC and the properties of carbon dots after HPLC fractionation
Source: Royal Society of Chemistry journal article supplement (doi:10.1039/c9nj00434c), 2019-01-01
Supplement: c9nj00434c1.pdf [file c9nj00434c1.pdf]

## **Supporting information**

### **Evaluating the dialysis time required for carbon dots by HPLC and the properties of the carbon dots after HPLC fractionation**

Chou-Yen Chen Yi-Hua Tsai and Chih-Wei Chang

*Department of Chemistry, National Changhua University of Education,  
Changhua, 50007, Taiwan*

## Table of contents

|                                                                                                                                                                                  |    |
|----------------------------------------------------------------------------------------------------------------------------------------------------------------------------------|----|
| Fig. S1: (a) The UV-HPLC and (b) the FL-HPLC of the dialysate (blue line) and the citric acid (gray line). The dialysate was collected after 3 hours dialysis. ....              | 3  |
| Fig. S2: The FL-HPLC of the C-dots dialyzed using (a) MWCO=1.0 kDa and (b) MWCO=0.5-1.0 kDa membranes. ....                                                                      | 4  |
| Fig. S3: The TEM images of (a) the C-dots ( $\alpha$ ), (b) the C-dots ( $\beta$ ) and (c) the C-dots ( $\gamma$ ). The averaged radius of C-dots indicates in the figures. .... | 5  |
| Fig. S4: The XPS C1s spectra of a:C-dots ( $\alpha$ ); b:C-dots ( $\beta$ ) and c:C-dots( $\gamma$ ). The XPS survey spectrum of each C-dots is indicated in the inset. ....     | 6  |
| Fig. S5: The fluorescence decay dynamics of C-dots in the absence and the presence of $\text{Hg}^{2+}$ ions. ....                                                                | 7  |
| Fig. S6: (a) The TEM image and (b) the energy dispersive x-ray spectra of the C-dots( $\alpha$ ) ....                                                                            | 8  |
| Fig. S7: (a) The TEM image and (b) the energy dispersive x-ray spectra of the C-dots( $\beta$ ) ....                                                                             | 9  |
| Fig. S8: (a) The TEM image and (b) the energy dispersive x-ray spectra of the C-dots( $\gamma$ ) ....                                                                            | 10 |
| Table S1: The fitting parameters of the fluorescence lifetime, the fluorescence anisotropy decay, and fluorescence quenching experiments of C-dots ....                          | 11 |

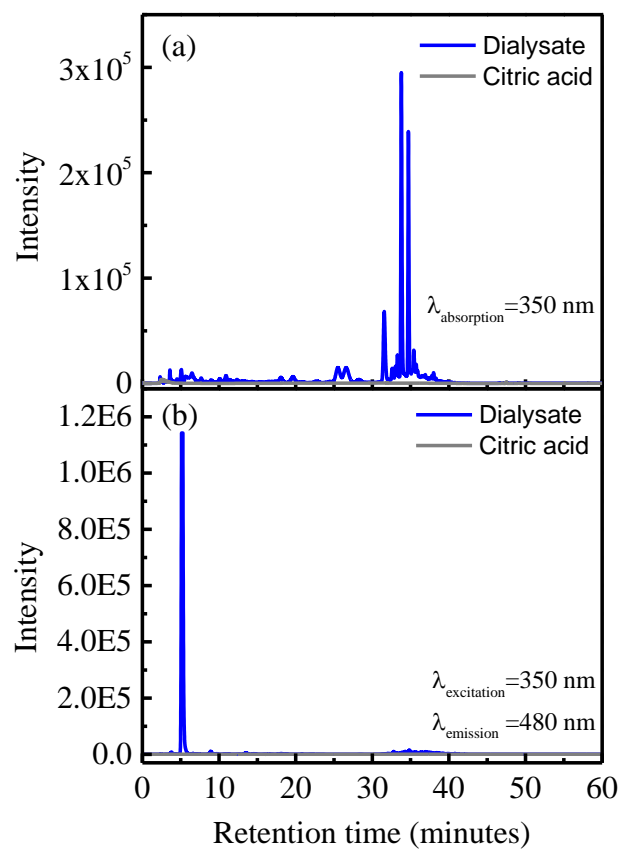

Fig. S1: (a) The UV-HPLC and (b) the FL-HPLC of the dialysate (blue line) and the citric acid (gray line). The dialysate was collected after 3 hours dialysis.

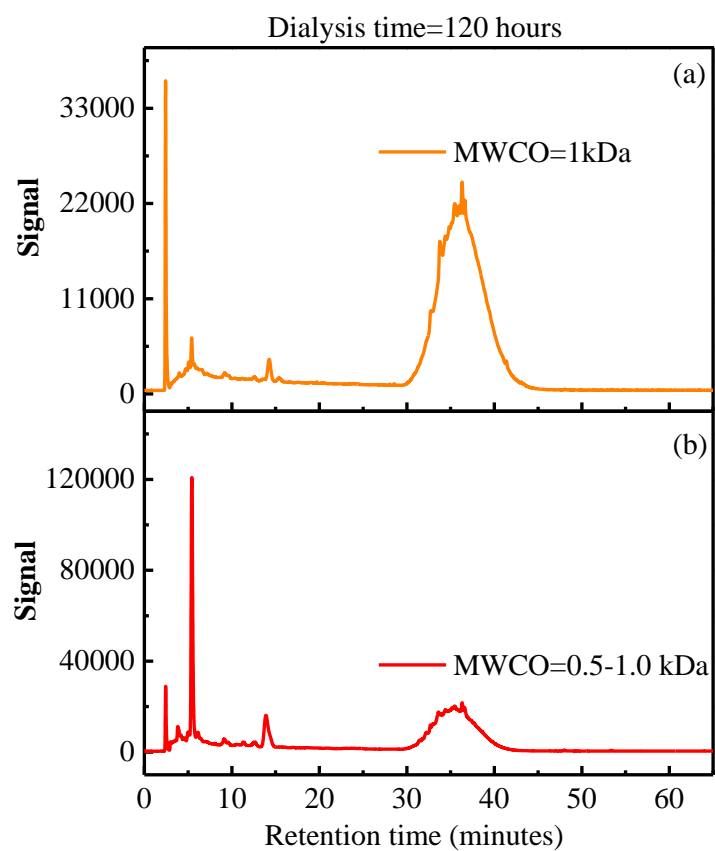

Fig. S<sub>2</sub>: The FL-HPLC of the C-dots dialyzed using (a) MWCO=1.0 kDa and (b) MWCO=0.5-1.0 kDa membranes.

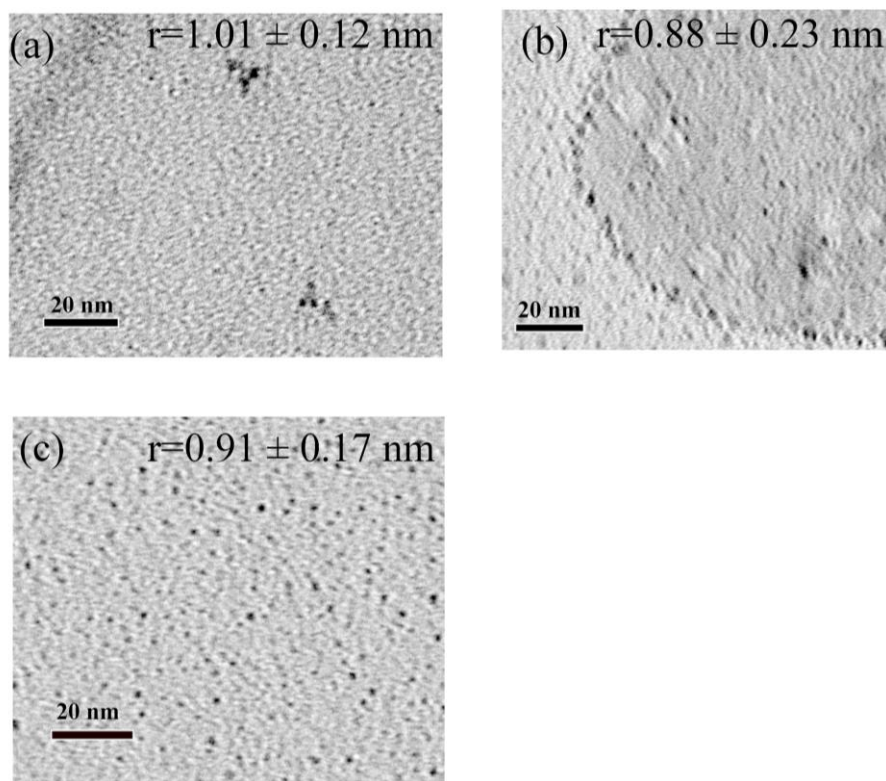

Fig. S3: The TEM images of (a) the C-dots ( $\alpha$ ), (b) the C-dots ( $\beta$ ) and (c) the C-dots ( $\gamma$ ). The averaged radius of C-dots indicates in the figures.

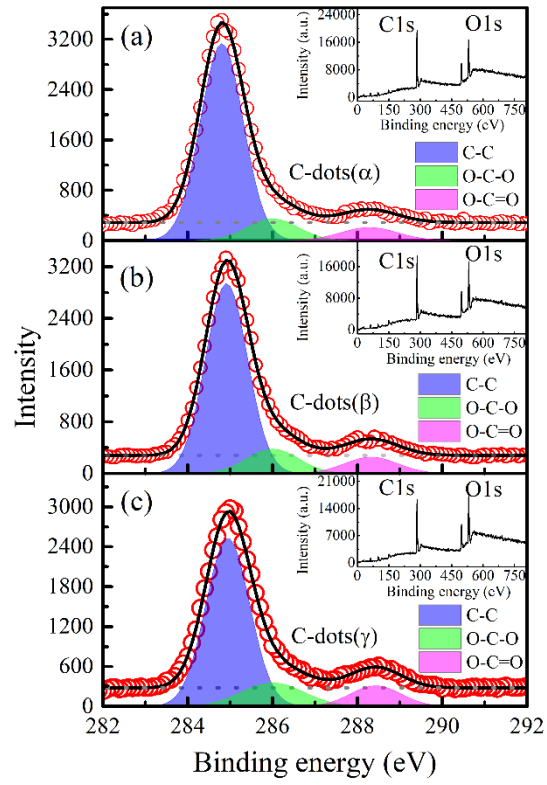

Fig. S4: The XPS C1s spectra of a:C-dots ( $\alpha$ ); b:C-dots ( $\beta$ ) and c:C-dots( $\gamma$ ). The XPS survey spectrum of each C-dots is indicated in the inset.

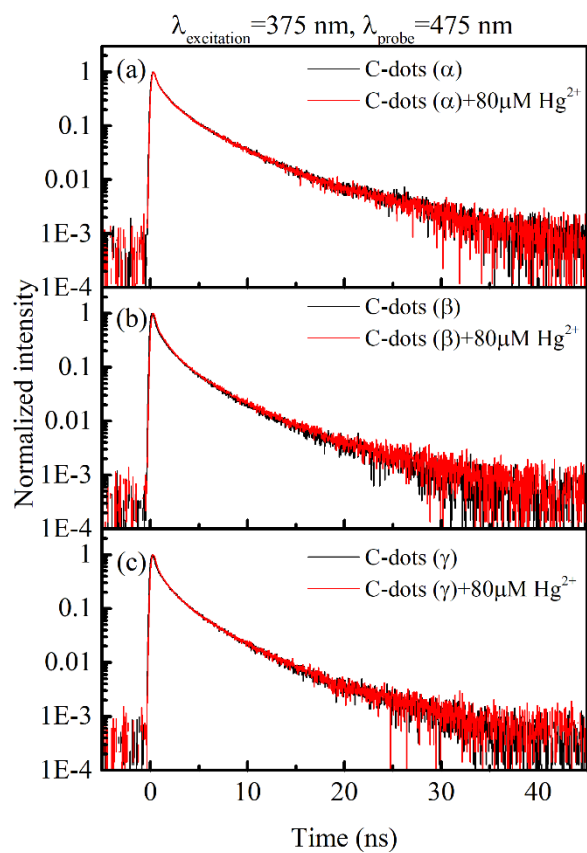

Fig. S5: The fluorescence decay dynamics of C-dots in the absence and the presence of  $\text{Hg}^{2+}$  ions.

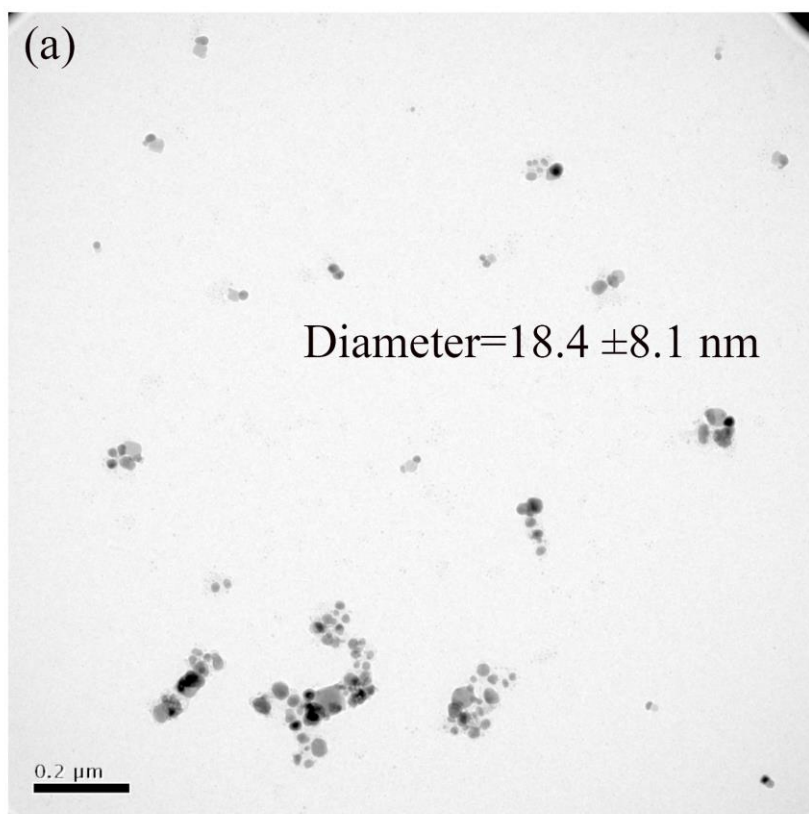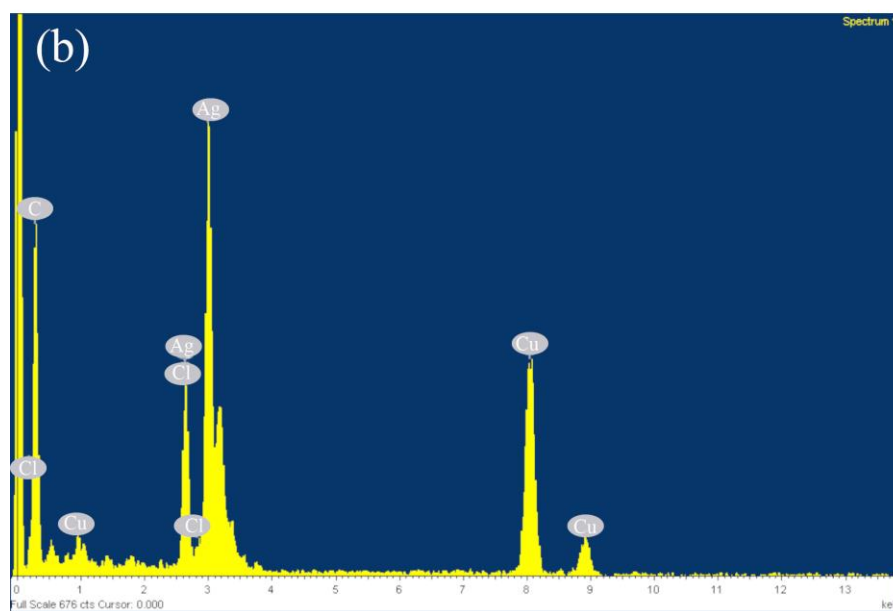

Fig. S6: (a) The TEM image and (b) the energy dispersive x-ray spectra of the C-dots( $\alpha$ )



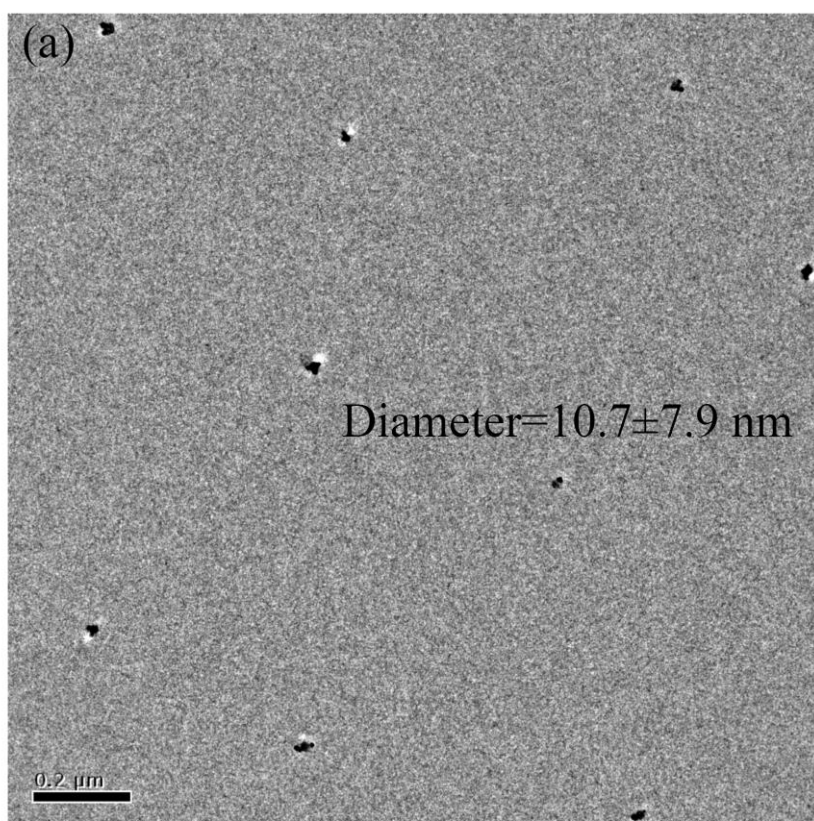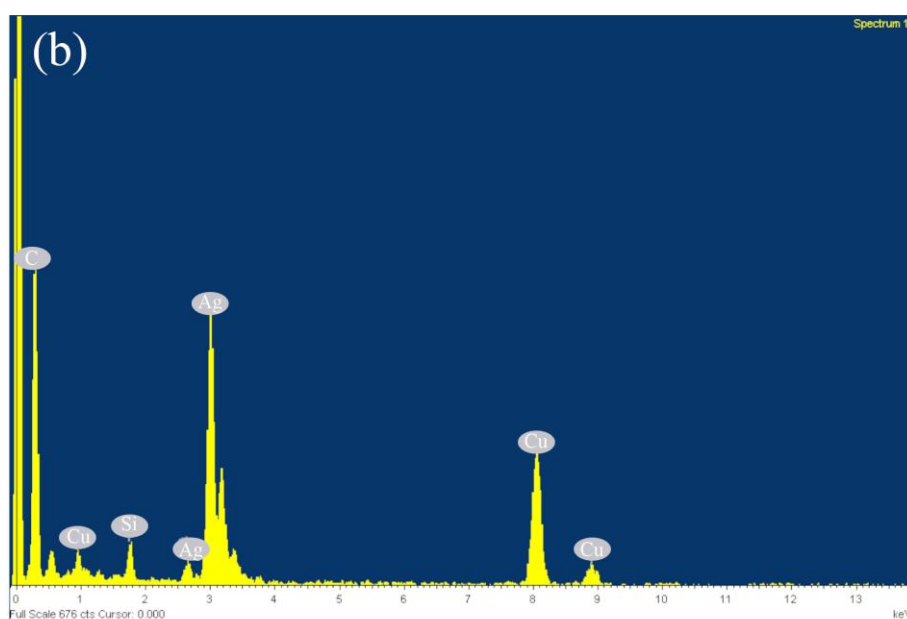

Fig. S7: (a) The TEM image and (b) the energy dispersive x-ray spectra of the C-dots( $\beta$ )

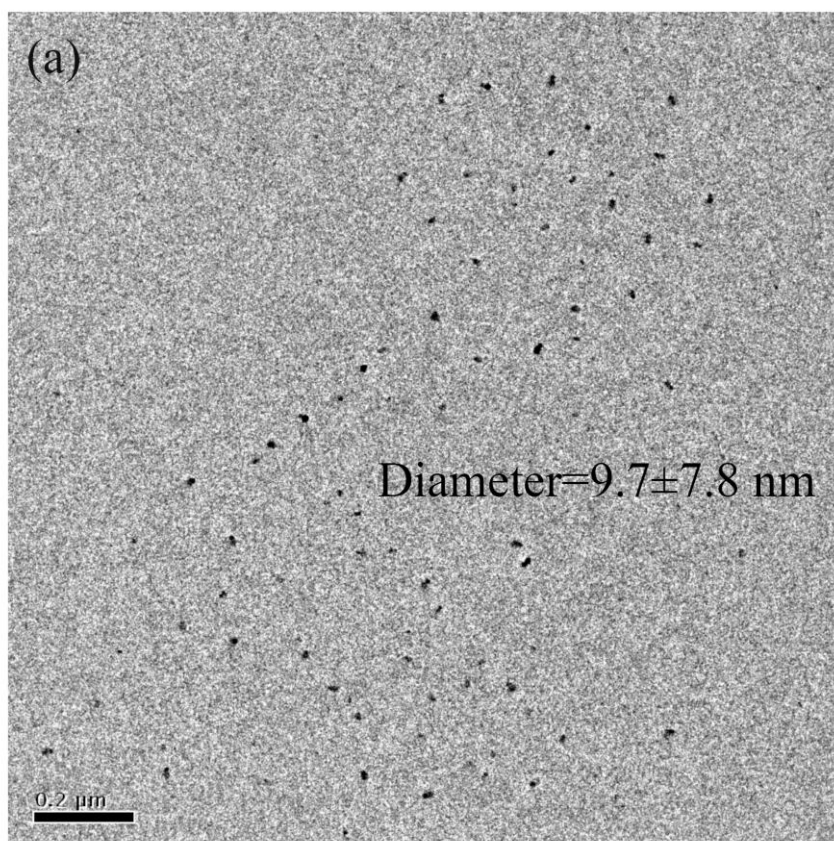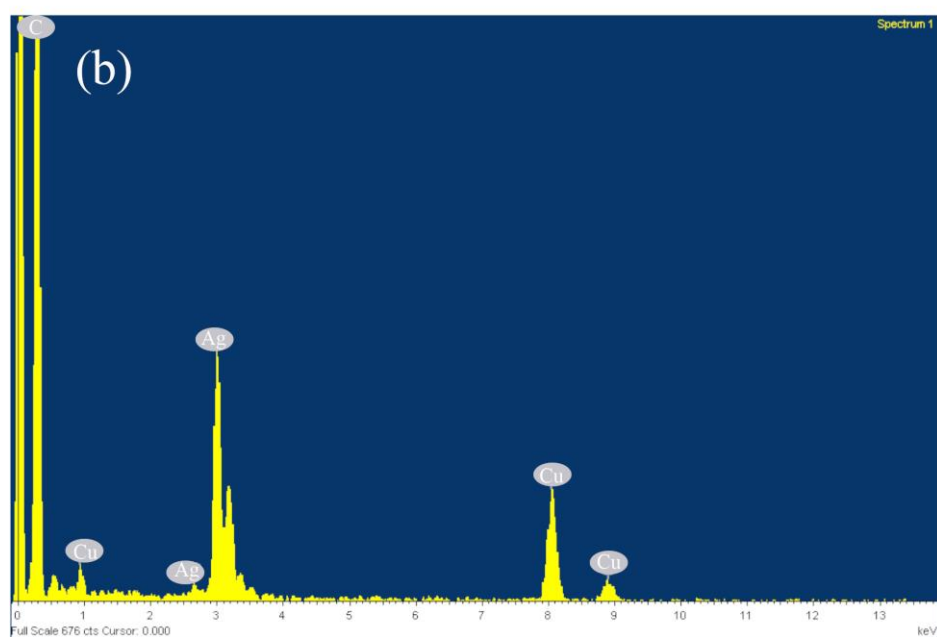

Fig. S8: (a) The TEM image and (b) the energy dispersive x-ray spectra of the C-dots( $\gamma$ )

Table S<sub>1</sub>: The fitting parameters of the fluorescence lifetime, the fluorescence anisotropy decay, and fluorescence quenching experiments of C-dots

|                                      |                               | C-dots( $\alpha$ ) | C-dots( $\beta$ ) | C-dots( $\gamma$ ) |
|--------------------------------------|-------------------------------|--------------------|-------------------|--------------------|
| <sup>a</sup> Fluorescence decay      | $\tau_1$ ( $a_1$ )            | 0.28 ns (0.07)     | 0.24 ns (0.05)    | 0.26 ns (0.04)     |
|                                      | $\tau_2$ ( $a_2$ )            | 1.98 ns (0.24)     | 1.71 ns (0.24)    | 1.96 ns (0.24)     |
|                                      | $\tau_3$ ( $a_3$ )            | 6.64 ns (0.69)     | 6.40 ns (0.70)    | 6.65 ns (0.71)     |
|                                      | $\tau_{\text{average}}$       | 3.62 ns            | 3.18 ns           | 3.08 ns            |
| Fluorescence quantum yield           | $\Phi_F$                      | 0.91%              | 1.03%             | 0.77%              |
| <sup>b</sup> Fluorescence anisotropy | $\tau_{\text{ani}}/\text{ns}$ | 0.46 ns            | 0.53 ns           | 0.55 ns            |
| Fluorescence quenching               | $K_a$ ( $M^{-1}$ )            | $6.8 \times 10^4$  | $2.9 \times 10^4$ | $3.6 \times 10^4$  |
|                                      | $\kappa$                      | 0.27               | 0.55              | 0.55               |

$${}^a I(t) = \sum_{i=1}^3 a_i \tau_i, \tau_{\text{average}} = \frac{\sum_{i=1}^3 a_i \tau_i^2}{\sum_{i=1}^3 a_i \tau_i}$$

$${}^b r(t) = A \times e^{-\frac{t}{\tau_{\text{ani}}}}$$
